# Supplementary material for: Intentions resurrected: a systematic review of entrepreneurial intention research from 2014 to 2018 and future research agenda
Source: Springer Nature journal article supplement (doi:10.1007/s11365-019-00578-5), 2019-04-24
Supplement: MOESM1 [file 16675092]

**APPENDIX 1**: Inclusion and exclusion criteria

| Criterion | Inclusion | Exclusion | Rationale |
| --- | --- | --- | --- |
| **Topic** | Focus on entrepreneurial intentions in all forms and encompassing variables: Multiple levels (individual, team and aggregate) and across all transitional phases of the entrepreneurship process (i.e. pre- and post-entry, transition from start up to new firm, in-firm intrapreneurship, corporate entrepreneurship, career intentions etc). | No focus on entrepreneurial intentions (perceived impacting and encompassing factors). Lack of interest in psychological and cognitive components of entrepreneurship. No exact wording or synonym related to intentions in the title or abstract. | Provision of sufficiently inclusive knowledge that enables the research objectives to be effectively met. Ensures that review remains grounded in intentional literature. |
| **Source type** | Academic peer-reviewed journal articles. | Books, book chapters, conference papers, theses, working papers, non-academic articles. | Displays information that is accepted, validated and of sufficient quality increasing the influence of generalisations that can be inferred. |
| **Source* location** | Only those outlets that provided an influential article in Liñán and Fayolle´s (2015) review were included in the study.Sources must be located in the first quartile of Scimagos journal ranks. | All other journals. | Highly pertinent to the topic of study and allows for an effective follow on from the previous review. Ensured that the dataset was workable and also created an increased likelihood of relevant papers being included. |
| **Time-period** | Journal articles published either online or in print between the years 2014-February 2018. | Articles before this time-frame. | Manageable dataset size that builds upon, extends and checks progress of a prior review. Large quantity of articles published within these four years needing structure and ordering. |
| **Language** | Only journals written and published were included. | Non-english language journals | Native language of the author |

*Upon acknowledgement of an expert anonymous reviewer it was suggested that the Small Business Economics journal should also be included. This process unearthed a further 42 articles that were deemed relevant over the time period.
